# Supplementary material for: Chloroplast Phylogenomic Analyses Resolve Multiple Origins of the Kengyilia Species (Poaceae: Triticeae) via Independent Polyploidization Events
Source: Frontiers journal article supplement (doi:10.3389/fpls.2021.682040), 2021-08-06
Supplement: Table_2.XLS [file Table_2.XLS]

## Sheet: parsimony site
Table S2 Features of each chloroplast protein-coding genes in analysis of polyploid and its diploid relatives.
gene	Conserved sites	Variable sites	Parsimony informative sites	Total sites	V/T a	P/T b
atpA	1497	18	7	1515	0.0118812	0.00462046
atpB	1484	13	6	1497	0.00868403	0.00400802
atpE	410	4	1	414	0.00966184	0.00241546
atpF	560	7	2	567	0.0123457	0.00352734
atpH	245	1	1	246	0.00406504	0.00406504
atpI	737	7	4	744	0.0094086	0.00537634
ccsA	946	23	9	975	0.0235897	0.00923077
cemA	683	10	3	693	0.01443	0.004329
clpP	643	8	3	651	0.0122888	0.00460829
infA	336	6	2	342	0.0175439	0.00584795
matK	1490	49	22	1539	0.0318389	0.014295
ndhA	1057	32	7	1089	0.0293848	0.00642792
ndhB	1530	3	2	1533	0.00195695	0.00130463
ndhC	359	4	2	363	0.0110193	0.00550964
ndhD	1485	18	3	1503	0.011976	0.00199601
ndhE	303	3	2	306	0.00980392	0.00653595
ndhF	2158	62	20	2220	0.0279279	0.00900901
ndhG	525	6	2	531	0.0112994	0.00376648
ndhH	489	17	9	506	0.0335968	0.0177866
ndhI	539	4	2	546	0.00732601	0.003663
ndhJ	476	4	2	480	0.00833333	0.00416667
ndhK	732	6	3	738	0.00813008	0.00406504
petA	950	13	4	963	0.0134995	0.00415369
petB	642	6	3	648	0.00925926	0.00462963
petD	484	5	4	489	0.0102249	0.00817996
petG	114	0	0	114	0	0
petL	93	3	2	96	0.03125	0.0208333
petN	90	0	0	90	0	0
psaA	2230	23	6	2253	0.0102086	0.00266312
psaB	2188	17	5	2205	0.00770975	0.00226757
psaC	242	4	3	246	0.0162602	0.0121951
psaI	109	2	1	111	0.018018	0.00900901
psaJ	128	1	0	129	0.00775194	0
psbA	868	11	4	879	0.0125142	0.00455063
psbB	1522	5	2	1527	0.00327439	0.00130976
psbC	1407	15	2	1422	0.0105485	0.00140647
psbD	1052	10	5	1062	0.0094162	0.0047081
psbE	251	1	0	252	0.00396825	0
psbF	120	0	0	120	0	0
psbH	221	1	0	222	0.0045045	0
psbI	110	1	0	111	0.00900901	0
psbJ	121	2	0	123	0.0162602	0
psbK	185	1	0	186	0.00537634	0
psbL	115	2	1	117	0.017094	0.00854701
psbM	102	3	1	105	0.0285714	0.00952381
psbN	132	0	0	132	0	0
psbT	116	1	1	117	0.00854701	0.00854701
psbZ	187	2	1	189	0.010582	0.00529101
rbcL	1408	26	18	1438	0.0180807	0.0125174
rpl2	822	3	0	825	0.00363636	0
rpl14	369	3	1	372	0.00806452	0.00268817
rpl16	409	2	0	412	0.00485437	0
rpl20	358	2	1	360	0.00555556	0.00277778
rpl22	429	21	9	469	0.0447761	0.0191898
rpl23	282	0	0	282	0	0
rpl32	186	6	2	196	0.0306122	0.0102041
rpl33	199	2	0	201	0.00995025	0
rpl36	113	1	1	114	0.00877193	0.00877193
rpoA	1003	17	5	1020	0.0166667	0.00490196
rpoB	3196	35	10	3231	0.0108326	0.00309502
rpoC1	2027	22	6	2049	0.0107369	0.00292826
rpoC2	4352	88	29	4440	0.0198198	0.00653153
rps2	704	7	4	711	0.00984529	0.00562588
rps3	710	10	4	720	0.0138889	0.00555556
rps4	599	7	1	606	0.0115512	0.00165017
rps7	466	5	1	471	0.0106157	0.00212314
rps8	411	0	0	411	0	0
rps11	428	4	2	432	0.00925926	0.00462963
rps12	372	3	2	380	0.00789474	0.00526316
rps14	308	4	1	312	0.0128205	0.00320513
rps15	271	2	2	273	0.00732601	0.00732601
rps16	272	4	1	276	0.0144928	0.00362319
rps18	507	6	1	513	0.0116959	0.00194932
rps19	280	2	0	282	0.0070922	0
ycf3	516	3	2	519	0.00578035	0.00385356
ycf4	551	7	2	558	0.0125448	0.00358423
a: V/T represents the ratio of the number of variable sites to the number of total sites.
b: P/T represents the ratio of the number of parsimony informative sites to the number of total sites.
