# Supplementary material for: Chloroplast Phylogenomic Analyses Resolve Multiple Origins of the Kengyilia Species (Poaceae: Triticeae) via Independent Polyploidization Events
Source: Frontiers journal article supplement (doi:10.3389/fpls.2021.682040), 2021-08-06
Supplement: Table_3.XLS [file Table_3.XLS]

## Sheet: Sheet1
Table S3 A distance matrix including 1,664 genetic values calculated from 52 protein-coding genes
No.	GenBanK	Genomes	atpA	atpB	atpE	atpF	atpH	atpI	ccsA	cemA	clpP	infA	matK	ndhA	ndhB	ndhC	ndhD	ndhE	ndhF	ndhG	ndhH	ndhI	ndhJ	ndhK	petA	petB	petD	psaA	psaB	psaC	psbA	psbB	psbC	psbD	rbcL	rpl14	rpl20	rpl22	rpoA	rpoB	rpoC1	rpoC2	rps2	rps3	rps4	rps7	rps11	rps12	rps14
1	MN703653	PP	0.00735078	0.00336247	0.00242718	0.00894947	0	0.00681199	0.0147796	0.00878811	0.0109193	0.00589537	0.0187136	0.0150643	0.000653168	0.0111889	0.0073984	0.00671148	0.0156862	0.00569803	0.0289875	0.00184843	0.00632911	0.00408719	0.00949048	0.00623421	0.0104384	0.00447459	0.00548982	0.00822202	0.00690653	0.00131212	0.00567681	0.00474025	0.00705919	0.00816334	0.00278941	0.0350936	0.00493682	0.0075171	0.00641042	0.0105579	0.0056899	0.00419288	0.0100377	0.00427123	0.00701763	0.00268097	0.00975623
2	MN703654	PP	0.00735078	0.00336247	0.00242718	0.00894947	0	0.00681199	0.0147796	0.00878811	0.0109193	0.00589537	0.0187136	0.0150643	0.000653168	0.0111889	0.0073984	0.00671148	0.0156862	0.00569803	0.0289875	0.00184843	0.00632911	0.00408719	0.00949048	0.00623421	0.0104384	0.00447459	0.00595252	0.00822202	0.00690653	0.00131212	0.00567681	0.00474025	0.00777064	0.00816334	0.00278941	0.0350936	0.00493682	0.0075171	0.00641042	0.01079	0.0056899	0.00419288	0.0100377	0.00427123	0.00701763	0.00268097	0.00975623
3	MN703655	PP	0.00667384	0.00336247	0.00242718	0.00894947	0	0.00817727	0.015867	0.00878811	0.0109193	0.00589537	0.0187136	0.0150643	0.000653168	0.0111889	0.0073984	0.00671148	0.0156862	0.00569803	0.0289875	0.00184843	0.00632911	0.00408719	0.00949048	0.00623421	0.0104384	0.00447459	0.00548982	0.00822202	0.00690653	0.00131212	0.00567681	0.00474025	0.00705919	0.00816334	0.00278941	0.0350936	0.00493682	0.0075171	0.00641042	0.0103243	0.0056899	0.00419288	0.0100377	0.00427123	0.00701763	0.00268097	0.00975623
4	MN703656	PP	0.00667384	0.00336247	0.00242718	0.00894947	0	0.00817727	0.015867	0.00878811	0.0109193	0.00589537	0.0187136	0.0150643	0.000653168	0.0111889	0.0073984	0.00671148	0.0156862	0.00569803	0.0289875	0.00184843	0.00632911	0.00408719	0.00949048	0.00623421	0.0104384	0.00447459	0.00548982	0.00822202	0.00690653	0.00131212	0.00639512	0.00474025	0.00705919	0.00816334	0.00278941	0.0350936	0.00493682	0.0075171	0.00641042	0.0105563	0.0056899	0.00419288	0.0100377	0.00427123	0.00701763	0.00268097	0.00975623
5	MN703657	PP	0.00667384	0.00336247	0.00242718	0.00894947	0	0.00817727	0.015867	0.00878811	0.0109193	0.00589537	0.0187136	0.0150643	0.000653168	0.0111889	0.0073984	0.00671148	0.0156862	0.00569803	0.0289875	0.00184843	0.00632911	0.00408719	0.00949048	0.00623421	0.0104384	0.00447459	0.00548982	0.00822202	0.00690653	0.00131212	0.00567681	0.00474025	0.00705919	0.00816334	0.00278941	0.0350936	0.00493682	0.0075171	0.00641042	0.0103243	0.0056899	0.00419288	0.0100377	0.00427123	0.00701763	0.00268097	0.00975623
6	MN703668	PP	0.0073443	0.00336247	0.00242718	0.00894947	0	0.00681199	0.0147796	0.00878811	0.0109193	0.00589537	0.0187136	0.0150643	0.000653168	0.0111889	0.0073984	0.00671148	0.0161616	0.00569803	0.0289875	0.00184843	0.00632911	0.00408719	0.00949048	0.00623421	0.0104384	0.00537907	0.00548982	0.00822202	0.0080759	0.00197044	0.00639512	0.00474025	0.00705919	0.00816334	0.00278941	0.0375967	0.00493682	0.0075171	0.00641042	0.0105563	0.0056899	0.00419288	0.0100334	0.00427123	0.00701763	0.00268097	0.00975623
7	MN703671	PP	0.00735078	0.00336247	0.00242718	0.00894947	0	0.00681199	0.0147796	0.00878811	0.0109193	0.00887574	0.0187136	0.0150643	0.000653168	0.0111889	0.0073984	0.00671148	0.0156862	0.00569803	0.0289875	0.00184843	0.00632911	0.00408719	0.00949048	0.00623421	0.0104384	0.00447459	0.00548982	0.00822202	0.00690653	0.00131212	0.00567681	0.00474025	0.00777064	0.00816334	0.00278941	0.0375967	0.00593475	0.0075171	0.00641042	0.0105579	0.0056899	0.00419288	0.0100377	0.00427123	0.00701763	0.00268097	0.00975623
8	MN703672	PP	0.00667384	0.00336247	0.00242718	0.00894947	0	0.00681199	0.0147796	0.00878811	0.0109193	0.00589537	0.0194045	0.0150643	0.000653168	0.0111889	0.0073984	0.00671148	0.0156862	0.00569803	0.0289875	0.00184843	0.00632911	0.00408719	0.00949048	0.00623421	0.0104384	0.00447459	0.00548982	0.00822202	0.00690653	0.00131212	0.00567681	0.00474025	0.00777491	0.00816334	0.00278941	0.0350936	0.00593475	0.0075171	0.00641042	0.0105579	0.0056899	0.00419288	0.0100377	0.00427123	0.00701763	0.00268097	0.00975623
9	KY126307	P	0.00667384	0.00336247	0.00487805	0.00894947	0	0.00817727	0.015867	0.00878811	0.0109193	0.00589537	0.0187136	0.0150643	0.000653168	0.0112165	0.0073984	0.00671148	0.0156862	0.00569803	0.0289875	0.00184843	0.00632911	0.00408719	0.00949048	0.00623421	0.0104384	0.00447459	0.00548982	0.00822202	0.00690653	0.00131212	0.00567681	0.00474025	0.00705919	0.00816334	0.00278941	0.0350936	0.00493682	0.0075171	0.00641042	0.0103243	0.0056899	0.00419288	0.0100377	0.00427123	0.00701763	0.00268097	0.00975623
10	MH285848	P	0.00735078	0.00336247	0.00242718	0.00894947	0	0.00681199	0.0147796	0.00878811	0.0109193	0.00589537	0.0187136	0.0160353	0.000653168	0.0111889	0.0080761	0.00671148	0.0156862	0.00569803	0.0289875	0.00184843	0.00632911	0.00408719	0.00949048	0.00623421	0.0104384	0.00447459	0.00548982	0.00822202	0.00690653	0.00131212	0.00567681	0.00474025	0.00705919	0.00816334	0.00278941	0.0350936	0.00493682	0.0075171	0.00641042	0.0110239	0.0056899	0.00419288	0.0100377	0.00427123	0.00701763	0.00268097	0.00975623
11	MK775249	StP	0.0059987	0.00268637	0.00242718	0.00534759	0.00409836	0.0027027	0.0115449	0.00732064	0.00776036	0	0.0187233	0.0140969	0.000653168	0.00835655	0.00672206	0	0.0133118	0.00764818	0.0225072	0.00184843	0.00209205	0.00408999	0.0105666	0.00781625	0.00205339	0.00537907	0.0045728	0.00822202	0.00343643	0.00131212	0.0042463	0.00378923	0.00850162	0.00541639	0	0.0182525	0.00493682	0.00625175	0.00491729	0.0100804	0.0056899	0.00560521	0.0100377	0.00212993	0.00701763	0.00539084	0.00646727
12	MN703669	StY	0.00533047	0.00268637	0.00242718	0.00534759	0.00409836	0.0027027	0.0115576	0.00732064	0.00619676	0	0.0180435	0.0140969	0.000653168	0.00835655	0.00808088	0	0.0128425	0.00571429	0.0246495	0.00184843	0.00209205	0.00546731	0.0105666	0.00781625	0.00205339	0.00537907	0.0045728	0.00822202	0.00343643	0.00131212	0.0042463	0.00378923	0.00991403	0.00541639	0	0.0206198	0.00593033	0.00625175	0.00491729	0.0100804	0.0056899	0.00420168	0.0100377	0.00212993	0.00701763	0.00539084	0.00646727
13	MN703670	StY	0.00533047	0.00336247	0.00487805	0.00715564	0.00409836	0.0027027	0.00943081	0.00732064	0.00776036	0	0.0180435	0.0160144	0.000653168	0.00835655	0.00740362	0	0.0123783	0.00571429	0.0204347	0	0.00209205	0.00408999	0.0105666	0.00781625	0.00205339	0.00537907	0.00503466	0.00822202	0.00343643	0.00131212	0.0042463	0.00569803	0.00991682	0.00541639	0	0.0182525	0.00493682	0.00656577	0.00640665	0.0100804	0.00713267	0.00560521	0.0100377	0.00212993	0.00701763	0.00268097	0.00646727
14	MK775252	StY	0.00533047	0.00268637	0.00242718	0.00534759	0.00409836	0.0040568	0.0104862	0.00732064	0.00619676	0	0.0201089	0.0140969	0.000653168	0.00835655	0.00740362	0	0.0123741	0.00571429	0.0203824	0.00184843	0.00209205	0.00408999	0.0105666	0.00781625	0.00205339	0.00583254	0.0045728	0.00822202	0.00459242	0.00131212	0.0042463	0.00378923	0.00848132	0.00541639	0	0.0206198	0.00493682	0.00656827	0.00491729	0.00961618	0.0056899	0.00560521	0.0100377	0.00212993	0.00701763	0.00539084	0.00646727
15	MN703658	StYP	0.00668074	0.00268637	0.00242718	0.00534759	0.00409836	0.0027027	0.0115576	0.00732064	0.00933493	0	0.0180333	0.0140969	0.000653168	0.00835655	0.00672206	0	0.0142432	0.00571429	0.0203824	0.00371058	0.00209205	0.00408999	0.0116472	0.00781625	0.00205339	0.00537907	0.0045728	0.00822202	0.00459242	0.00131212	0.0042463	0.00378923	0.00848132	0.00541639	0	0.0182525	0.00493682	0.00625175	0.00491729	0.00915256	0.0056899	0.00702549	0.0100377	0.00212993	0.00701763	0.00539084	0.00646727
16	MN703659	StYP	0.00533047	0.00268637	0.00242718	0.00534759	0.00409836	0.0027027	0.0115576	0.00732064	0.00619676	0	0.0187233	0.0150643	0.000653168	0.00835655	0.00808088	0	0.0123741	0.00571429	0.0246495	0.00184843	0.00209205	0.00546731	0.0105666	0.00781625	0.00205339	0.00537907	0.0045728	0.00822202	0.00343643	0.00131212	0.0042463	0.00378923	0.00991403	0.00541639	0	0.0206198	0.00593033	0.00625175	0.00491729	0.00984912	0.0056899	0.00560521	0.0100377	0.00212993	0.00701763	0.00539084	0.00646727
17	MK775255	StYP	0.00533047	0.00268637	0.00242718	0.00534759	0.00409836	0.0027027	0.0115449	0.00732064	0.00619676	0	0.0180435	0.0140969	0.000653168	0.00835655	0.0073984	0	0.0123741	0.00571429	0.0225072	0.00371058	0.00209205	0.00546731	0.0105666	0.00781625	0.00205339	0.00537907	0.005031	0.00822202	0.00343643	0.00131212	0.0042463	0.00378923	0.00919805	0.00541639	0	0.0206198	0.00493682	0.00625175	0.00491729	0.009618	0.0056899	0.00560521	0.0100377	0.00212993	0.00701763	0.00539084	0.00646727
18	MN703660	StYP	0.00533047	0.00268637	0.00487805	0.00534759	0.00409836	0.0027027	0.0105	0.00732064	0.00776036	0	0.0187344	0.0140969	0.000653168	0.00835655	0.00672206	0	0.0123741	0.00762457	0.0182749	0.00371058	0.00209205	0.00408999	0.0105666	0.00781625	0.00205339	0.00583254	0.0045728	0.00822202	0.00343643	0.00131212	0.0042463	0.00378923	0.00848132	0.00541639	0	0.0206198	0.00593033	0.00688248	0.00491729	0.00938346	0.0056899	0.00702549	0.0100377	0.00212993	0.00701763	0.00539084	0.00646727
19	MN703661	StYP	0.0060047	0.00336247	0.00487805	0.00715564	0.00409836	0.0027027	0.00943081	0.00732064	0.00776036	0	0.0166671	0.0160144	0.000653168	0.00835655	0.00672206	0	0.0123741	0.00571429	0.0204347	0.00184843	0.00209205	0.00408999	0.0105666	0.00781625	0.00205339	0.00582822	0.00503466	0.00822202	0.00343643	0.00131212	0.0042463	0.00569803	0.00991682	0.00541639	0	0.0182525	0.00493682	0.00624945	0.00541123	0.00984573	0.0056899	0.00419288	0.0100377	0.00212993	0.00701763	0.00537274	0.00646727
20	MN703662	StYP	0.0060047	0.00336247	0.00487805	0.00715564	0.00409836	0.0027027	0.00943081	0.00732064	0.00776036	0	0.0166671	0.0160144	0.000653168	0.00835655	0.00672206	0	0.0123741	0.00571429	0.0204347	0.00184843	0.00209205	0.00408999	0.0105666	0.00781625	0.00205339	0.00582822	0.00503466	0.00822202	0.00343643	0.00131212	0.0042463	0.00569803	0.00991682	0.00541639	0	0.0182525	0.00493682	0.00624945	0.00541123	0.00961452	0.0056899	0.00419288	0.0100377	0.00212993	0.00701763	0.00537274	0.00646727
21	MN703663	StYP	0.0060047	0.00336247	0.00487805	0.00715564	0.00409836	0.0027027	0.00943081	0.00732064	0.00776036	0	0.0166671	0.0160144	0.000653168	0.00835655	0.00672206	0	0.0123741	0.00571429	0.0204347	0.00184843	0.00209205	0.00408999	0.0105666	0.00781625	0.00205339	0.00582822	0.00503466	0.00822202	0.00343643	0.0019698	0.0042463	0.00569803	0.00991682	0.00541639	0	0.0182525	0.00493682	0.00624945	0.00541123	0.00961452	0.0056899	0.00419288	0.0100377	0.00212993	0.00701763	0.00537274	0.00646727
22	MN703664	StYP	0.0060047	0.00336247	0.00487805	0.00715564	0.00409836	0.0027027	0.00943081	0.00732064	0.00776036	0	0.0166671	0.0160144	0.000653168	0.00835655	0.00672206	0	0.0123741	0.00571429	0.0204347	0.00184843	0.00209205	0.00408999	0.0105666	0.00781625	0.00205339	0.00582822	0.00503466	0.00822202	0.00343643	0.00131212	0.0042463	0.00569803	0.00991682	0.00541639	0	0.0182525	0.00493682	0.00624945	0.00541123	0.00961452	0.0056899	0.00419288	0.0100377	0.00212993	0.00701763	0.00537274	0.00646727
23	MN703665	StYP	0.0060047	0.00336247	0.00487805	0.00715564	0.00409836	0.0027027	0.00943081	0.00732064	0.00776036	0	0.0166671	0.0160144	0.000653168	0.00835655	0.00672206	0	0.0123741	0.00571429	0.0204347	0.00184843	0.00209205	0.00408999	0.0105666	0.00781625	0.00205339	0.00582822	0.00503466	0.00822202	0.00343643	0.00131212	0.0042463	0.00569803	0.00991682	0.00541639	0	0.0182525	0.00493682	0.00624945	0.00541123	0.00961452	0.0056899	0.00419288	0.0100377	0.00212993	0.00701763	0.00537274	0.00646727
24	MN703666	StYP	0.00533047	0.00268637	0.00242718	0.00534759	0.00409836	0.0027027	0.0115576	0.00732064	0.00619676	0	0.0180435	0.0140969	0.000653168	0.00835655	0.00808088	0	0.0123741	0.00571429	0.0246495	0.00184843	0.00209205	0.00546731	0.0105666	0.00781625	0.00205339	0.00537907	0.0045728	0.00822202	0.00343643	0.00131212	0.0042463	0.00378923	0.00991403	0.00541639	0	0.0206198	0.00593033	0.00625175	0.00491729	0.00984912	0.0056899	0.00560521	0.0100377	0.00212993	0.00701763	0.00539084	0.00646727
25	MN703667	StYP	0.0059987	0.0040404	0.00242718	0.00715564	0	0.00681199	0.0126336	0.00878811	0.0109193	0.00888899	0.0180245	0.0160144	0.000653168	0.0111889	0.0073984	0.00671148	0.0161534	0.00569803	0.0268095	0.00184843	0.00632911	0.00408719	0.00949048	0.00623421	0.00831601	0.00492642	0.00548982	0.00822202	0.00690653	0.000655523	0.00567681	0.00474025	0.00563381	0.00816334	0.00278941	0.0350936	0.00493682	0.0075171	0.00591173	0.0105434	0.0056899	0.00139276	0.0100377	0.00427123	0.00701763	0.00268097	0.0130507
26	MH285855	St	0.00533047	0.00268637	0.00242718	0.00894947	0.00409836	0.0027027	0.0105	0.0117855	0.00776036	0	0.0200973	0.0170315	0.000653168	0.00835655	0.00740362	0	0.0128386	0.00571429	0.0204347	0.00371058	0.00419068	0.00408999	0.0105666	0.00623421	0.00205339	0.00537907	0.00503466	0.00822202	0.00343643	0.00131212	0.0042463	0.00378923	0.00920134	0.00541639	0	0.0182525	0.00593475	0.00656577	0.00491729	0.0110125	0.0056899	0.00419288	0.0100377	0.00212993	0.00701763	0.00268097	0.00646727
27	KY636117	St	0.00533047	0.00268637	0.00242718	0.00534759	0.00409836	0.0027027	0.0115449	0.00732064	0.00776036	0	0.0187344	0.0140969	0.000653168	0.00835655	0.00672206	0	0.0133075	0.00571429	0.0182749	0.00184843	0.00209205	0.00408999	0.0105666	0.00781625	0.00205339	0.00537907	0.0045728	0.00822202	0.00343643	0.00131212	0.0042463	0.00378923	0.00850162	0.00541639	0	0.0182525	0.00493682	0.00625175	0.00491729	0.00984735	0.0056899	0.00702549	0.0100377	0.00212993	0.00701763	0.00539084	0.00646727
28	KY636118	St	0.00533047	0.00268637	0.00242718	0.00715564	0.00409836	0.0027027	0.0126519	0.00732064	0.00776036	0	0.0187233	0.0199282	0.000653168	0.00835655	0.00672206	0	0.014253	0.00571429	0.0204347	0.00371058	0.00209205	0.00546076	0.0105666	0.00781625	0.00205339	0.00537907	0.00503466	0.00822202	0.00343643	0.00131212	0.0042463	0.0047452	0.00920134	0.00541639	0	0.0182525	0.00693663	0.00656577	0.00491729	0.0105452	0.0056899	0.00419288	0.0100377	0.00212993	0.00701763	0.00268097	0.00646727
29	KY636121	St	0.00533047	0.00268637	0.00242718	0.00534759	0.00409836	0.0027027	0.0115449	0.00660066	0.00776036	0	0.0194272	0.0133333	0.000653168	0.00835655	0.00740362	0	0.0128425	0.00571429	0.0203824	0.00184843	0.00209205	0.00408999	0.0105666	0.00781625	0.00205339	0.00537907	0.0045728	0.0123967	0.00343643	0.00131212	0.0042463	0.0047452	0.00850162	0.00541639	0	0.0182525	0.00493682	0.00625175	0.00491729	0.00961618	0.0056899	0.00560521	0.0100377	0.00212993	0.00701763	0.00539084	0.00646727
30	KY636131	St	0.00533047	0.00335864	0.00242718	0.00534759	0.00409836	0.0027027	0.00985418	0.00732064	0.00776036	0	0.0180435	0.0150643	0.000653168	0.00835655	0.00672206	0	0.0123741	0.00571429	0.0203824	0.00184843	0.00209205	0.00408999	0.0105666	0.00781625	0.00205339	0.00582822	0.0045728	0.00822202	0.00575374	0.00131212	0.0042463	0.00378923	0.00848132	0.00541639	0	0.0182525	0.00493682	0.00625175	0.00541402	0.00938346	0.0056899	0.00560521	0.0100377	0.00212993	0.00701763	0.00539084	0.00646727
31	KX822019	St	0.00533047	0.00335864	0.00242718	0.00534759	0.00409836	0.0027027	0.00943081	0.00732064	0.00776036	0	0.0180435	0.0150643	0.000653168	0.00835655	0.00672206	0.00334448	0.0123741	0.00571429	0.0203824	0.00184843	0.00209205	0.00408999	0.0105666	0.00781625	0.00205339	0.00537907	0.0045728	0.00822202	0.00459242	0.00131212	0.0042463	0.00378923	0.00848132	0.00541639	0	0.0182525	0.00493682	0.00625175	0.00491729	0.00938346	0.0056899	0.00560521	0.0100377	0.00212993	0.00701763	0.00539084	0.00646727
32	MH331643	Ee	0.0060047	0.00335864	0.00242718	0.00713496	0.00409836	0.0027027	0.00943081	0.00732064	0.00776036	0.00623059	0.0201089	0.0160353	0.00130804	0.00835655	0.00672206	0	0.015184	0.00571429	0.0203824	0.00184843	0.00209205	0.00408999	0.0116472	0.00623421	0.00205339	0.00628209	0.0045728	0.00409	0.00459242	0.00131212	0.00567681	0.00378923	0.00919805	0.00541639	0	0.020556	0.00894198	0.00625175	0.00591173	0.0107769	0.0056899	0.00702549	0.0117323	0.0086092	0.00701763	0.00539084	0.00646727
33	MH331639	Eb	0.00533047	0.0040404	0.00242718	0.00534759	0.00409836	0.0027027	0.0104862	0.00732064	0.00776036	0	0.0207919	0.0150643	0.000653168	0.00835655	0.00672206	0	0.0123741	0.00571429	0.0203824	0.00184843	0.00209205	0.00408999	0.0116472	0.00623421	0.00205339	0.00628681	0.00503466	0.00822202	0.00459242	0.00131212	0.00638981	0.00378923	0.00848132	0.00541639	0.0027933	0.0182525	0.00693663	0.00625175	0.00541402	0.00938346	0.0056899	0.00560521	0.0117323	0.00212993	0.00701763	0.00539084	0.00646727
[truncated: 5 more columns]
